# Supplementary material for: Study of the mechanochemical formation and resulting properties of an archetypal MOF: Cu3(BTC)2 (BTC = 1,3,5-benzenetricarboxylate)
Source: Royal Society of Chemistry journal article supplement (doi:10.1039/c0ce00486c), 2010-01-01
Supplement: c0ce00486c.pdf [file c0ce00486c.pdf]

## Study of the mechanochemical formation and resulting properties of an archetypal MOF: $\text{Cu}_3(\text{BTC})_2$ (BTC = 1,3,5-benzenetricarboxylate)

Wenbing Yuan, Ana Lazuen Garay, Anne Pichon, Rob Clowes, Colin D. Wood, Andrew I. Cooper and Stuart L. James\*

Supplementary information: XRPD patterns, adsorption and desorption isotherms TGA-DSC.

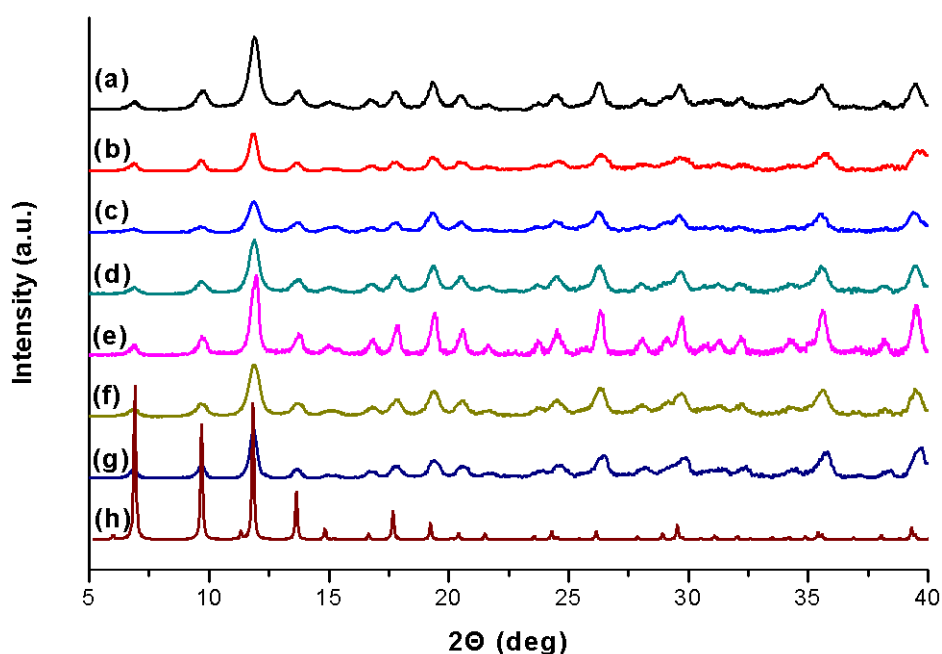

**Figure S1.** Comparison of experimental and simulated XRPD patterns for  $\text{Cu}_3(\text{BTC})_2$  synthesised by (a) 5 minutes grinding then washing with EtOH; (b) 5 minutes grinding with added MeOH (100  $\mu\text{L}$ ) then washed with EtOH; (c) 15 minutes grinding with no washing; (d) 15 minutes and washing with EtOH; (e) 15 minutes grinding with added MeOH (100  $\mu\text{L}$ ) and washing with EtOH; (f) 25 minutes and washing with EtOH; (g) 25 minutes grinding with added MeOH (100  $\mu\text{L}$ ) and washing with EtOH; (h) simulated for FIQCEN (CCDC code).

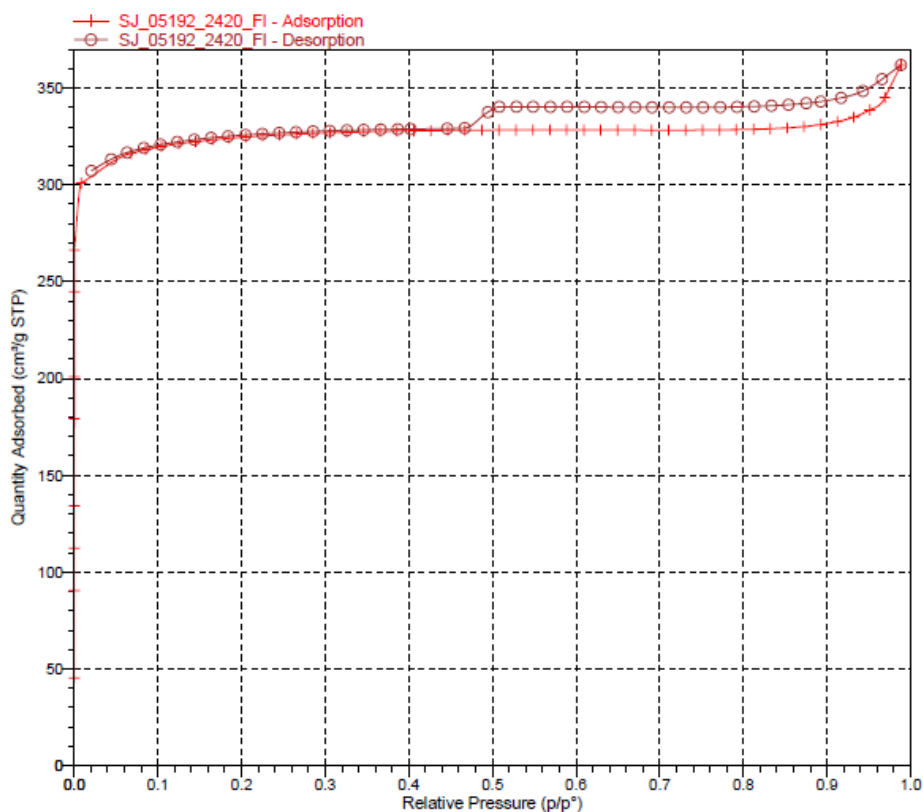

**Figure S2.** Adsorption and desorption  $N_2$  isotherms for  $Cu_3(BTC)_2$  prepared by neat grinding for 5 minutes followed by washing with EtOH.

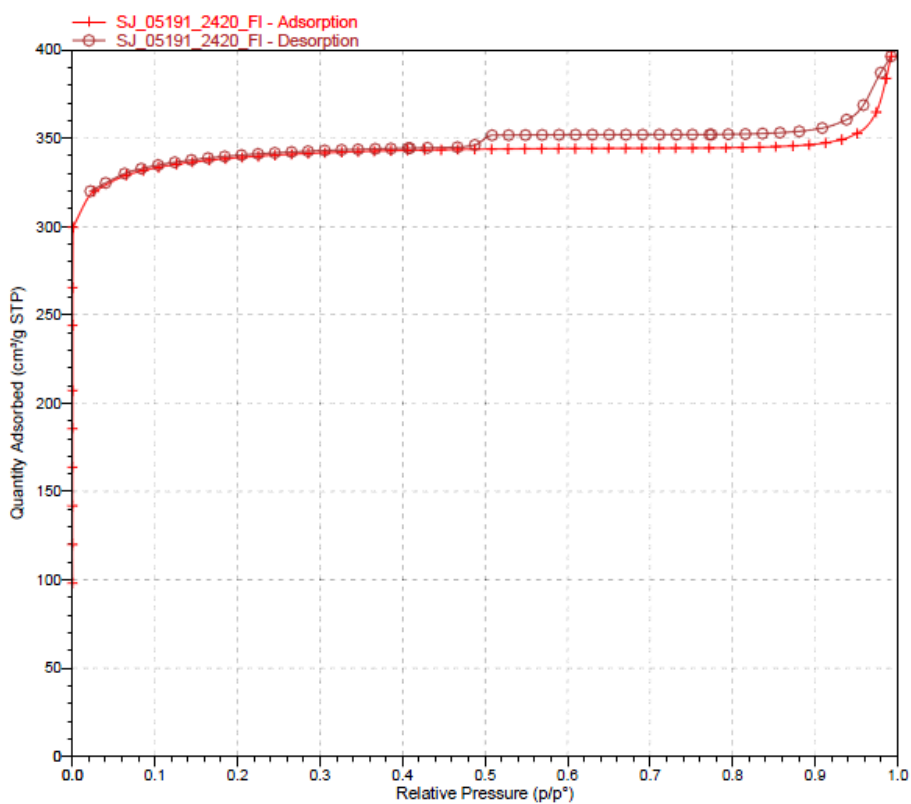

**Figure S3.**  $N_2$  adsorption and desorption isotherms for  $Cu_3(BTC)_2$  prepared by liquid-assisted grinding for 5 minutes with added MeOH (100  $\mu$ L) followed by washing with EtOH.

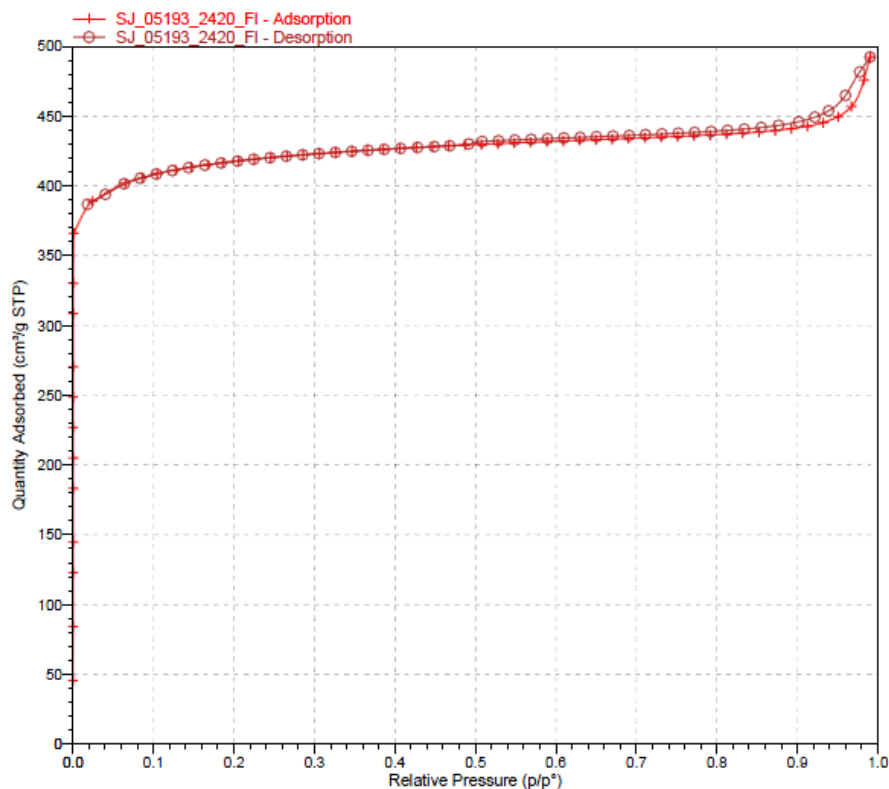

**Figure S4.** N<sub>2</sub> adsorption and desorption isotherms for Cu<sub>3</sub>(BTC)<sub>2</sub> prepared by liquid-assisted grinding for 15 minutes with added MeOH (100 μL) followed by washing with EtOH.

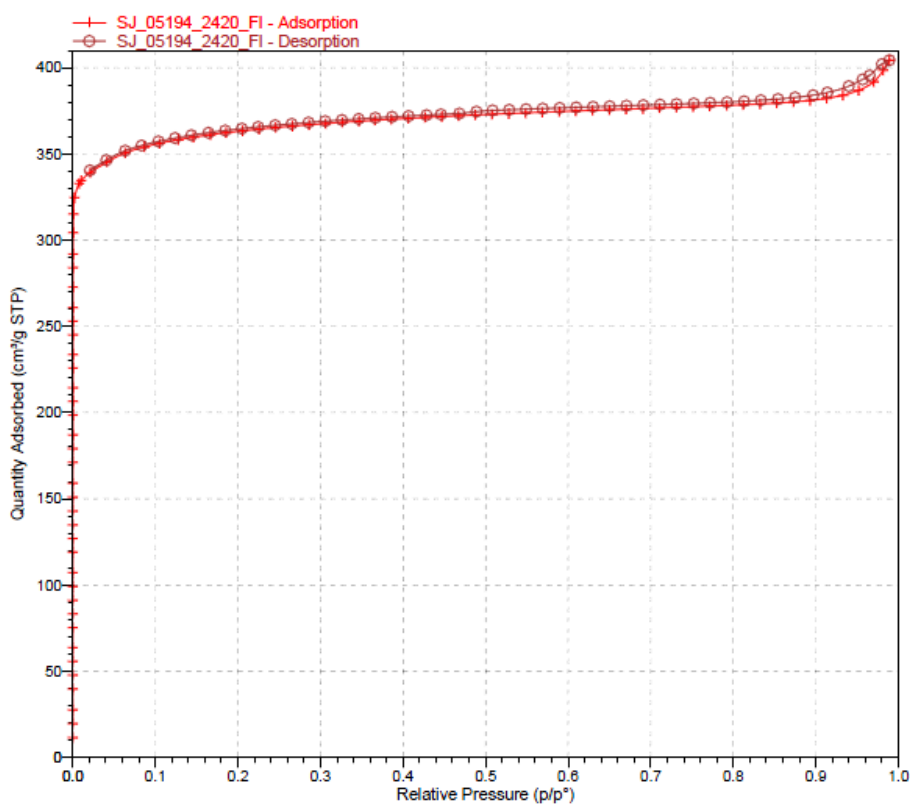

**Figure S5.** N<sub>2</sub> adsorption and desorption isotherms for the Cu<sub>3</sub>(BTC)<sub>2</sub> prepared by neat grinding for 15 minutes followed by washing with EtOH.

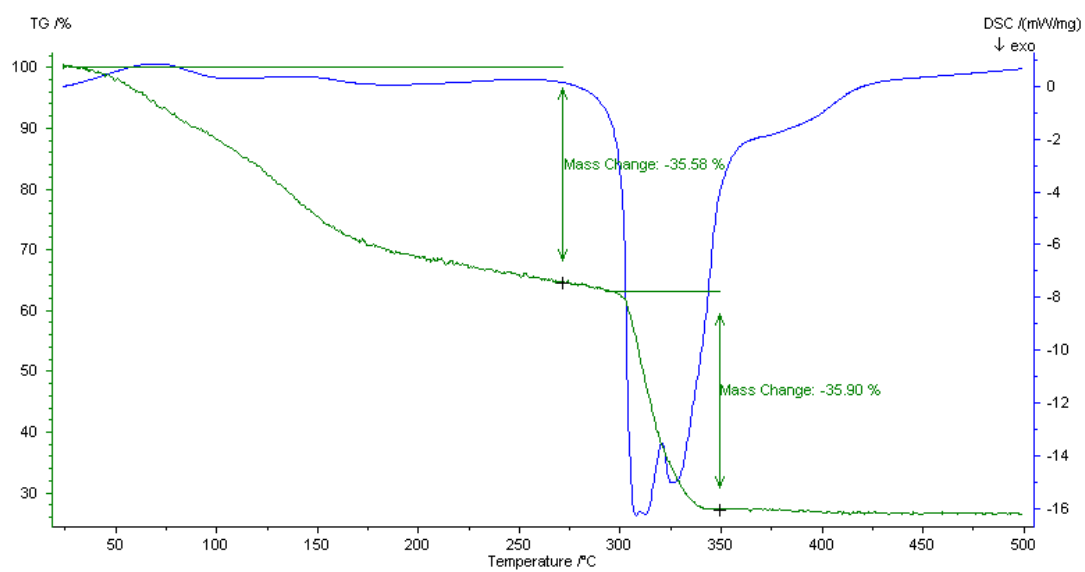

**Figure S6.** TGA-DSC mechanochemically-prepared  $\text{Cu}_3(\text{BTC})_2$  without LAG and without subsequent washing.
